# Supplementary material for: Effect of Early Supraglottic Airway Device Insertion on Chest Compression Fraction during Simulated Out-of-Hospital Cardiac Arrest: Randomized Controlled Trial
Source: Research Square preprint supplement (doi:10.21203/rs.3.rs-778473/v1), 2021-08-09
Supplement: Supplementary file 2 [file aff741fd43bb494efa1b93d1.pdf]

## **Supplementary File S2 - Standard Operating Procedure (French version)**

### **Indications et prérequis**

- ☐ Confirme l'indication à l'i-gel : ACR
- ☐ Aspiration fonctionnelle à portée de main

### **Préparation du matériel**

- ☐ I-GEL de taille appropriée
- ☐ Lubrifiant non siliconé (type K-Y)
- ☐ Moyen de fixation (lacet, scotch, fixe-tube)
- ☐ Capteur EtCO<sub>2</sub>

### **Mise en place du dispositif**

- ☐ Lubrifie suffisamment l'i-gel (sauf partie antérieure)
- ☐ Compressions thoraciques continues dès le début et durant toute la pose du dispositif
- ☐ Vérifie l'absence de corps étranger dans la bouche avant l'insertion
- ☐ Ouvre la bouche en effectuant une bascule de la tête et/ou une traction de la mandibule
- ☐ Effectue l'insertion de l'i-gel sans forcer (se positionne de lui-même avec précision et naturellement par-dessus la structure laryngée)
- ☐ Connecte le ballon auto-remplisseur avec le filtre suivi du capteur EtCO<sub>2</sub>

### **Evaluation**

- ☐ Vérifie le bon placement du dispositif à l'aide de la capnographie, le corrige au besoin
- ☐ S'assure du bon fonctionnement du système et de l'efficacité de la ventilation

### **Suite de soins**

- ☐ Effectue le MCE en continu sauf si ventilation inadéquate en l'absence de pauses
- ☐ Optionnel : sécurise l'i-gel à l'aide d'un moyen de fixation
- ☐ Optionnel : pose une sonde gastrique de taille adaptée et s'assure de sa position

### **Adaptations période COVID :**

- l'équipement de protection des intervenants doit être maximal : au minimum masque FFP2, gants et lunettes de protection
- le filtre est monté directement sur l'i-gel lors de sa préparation
- le reste de la procédure est inchangé
